# Supplementary material for: Immunopeptidomics reveals determinants of Mycobacterium tuberculosis antigen presentation on MHC class I
Source: eLife journal article supplement (doi:10.7554/elife.84070), 2023-04-19
Supplement: supp [file Figure 2 source data 2.xlsx]

## Sheet: 24h - 24 h post-infection
24 h post-infection
Galectin 3 (H37Rv)			Galectin 3 (eccCa1:Tn)			P62 (H37Rv)			P62 (eccCa1:Tn)			MHC-I			LAMP-1
Co-localized Mtb-containing phagosomes	Total Mtb-containing phagosomes	Proportion co-localized (%)	Co-localized Mtb-containing phagosomes	Total Mtb-containing phagosomes	Proportion co-localized (%)	Co-localized Mtb-containing phagosomes	Total Mtb-containing phagosomes	Proportion co-localized (%)	Co-localized Mtb-containing phagosomes	Total Mtb-containing phagosomes	Proportion co-localized (%)	Co-localized Mtb-containing phagosomes	Total Mtb-containing phagosomes	Proportion co-localized (%)	Co-localized Mtb-containing phagosomes	Total Mtb-containing phagosomes	Proportion co-localized (%)
6	649	0.924499	0	1225	0	9	2793	0.322234	2	1547	0.129282	0	1938	0	27	1220	2.21311
22	4619	0.476294	1	1553	0.0643915	38	3413	1.11339	0	1324	0	0	6727	0	90	3664	2.45633
18	5409	0.332779	3	13870	0.0216294	21	1259	1.66799	9	7624	0.118048	7	5249	0.133359	50	5608	0.891583
12	1566	0.766284				31	1842	1.68295				7	2416	0.289735	76	5215	1.45733

## Sheet: 72h - 72 h post-infection
72 h post-infection
Galectin 3 (H37Rv)			Galectin 3 (eccCa1:Tn)			P62 (H37Rv)			P62 (eccCa1:Tn)			MHC-I			LAMP-1
Co-localized Mtb-containing phagosomes	Total Mtb-containing phagosomes	Proportion co-localized (%)	Co-localized Mtb-containing phagosomes	Total Mtb-containing phagosomes	Proportion co-localized (%)	Co-localized Mtb-containing phagosomes	Total Mtb-containing phagosomes	Proportion co-localized (%)	Co-localized Mtb-containing phagosomes	Total Mtb-containing phagosomes	Proportion co-localized (%)	Co-localized Mtb-containing phagosomes	Total Mtb-containing phagosomes	Proportion co-localized (%)	Co-localized Mtb-containing phagosomes	Total Mtb-containing phagosomes	Proportion co-localized (%)
34	5612	0.605845	4	1628	0.2457	8	5093	0.157078	0	1101	0	2	19640	0.0101833	129	5977	2.15827
13	3552	0.365991	3	2964	0.101215	26	5981	0.43471	0	4724	0	4	5073	0.0788488	156	7863	1.98398
19	6742	0.281815	4	13493	0.029645	28	9262	0.302311	2	9813	0.0203811	2	8456	0.0236518	337	10166	3.31497
25	5680	0.440141				32	4753	0.673259				2	7590	0.0263505	122	5744	2.12396

## Sheet: 120 h - 120 h post-infection
120 h post-infection
Galectin 3 (H37Rv)			Galectin 3 (eccCa1:Tn)			P62 (H37Rv)			P62 (eccCa1:Tn)			MHC-I			LAMP-1
Co-localized Mtb-containing phagosomes	Total Mtb-containing phagosomes	Proportion co-localized (%)	Co-localized Mtb-containing phagosomes	Total Mtb-containing phagosomes	Proportion co-localized (%)	Co-localized Mtb-containing phagosomes	Total Mtb-containing phagosomes	Proportion co-localized (%)	Co-localized Mtb-containing phagosomes	Total Mtb-containing phagosomes	Proportion co-localized (%)	Co-localized Mtb-containing phagosomes	Total Mtb-containing phagosomes	Proportion co-localized (%)	Co-localized Mtb-containing phagosomes	Total Mtb-containing phagosomes	Proportion co-localized (%)
33	5035	0.655412	9	1741	0.516944	11	6548	0.16799	0	4517	0	0	1711	0	1	4714	0.0212134
37	6658	0.555722	6	2474	0.242522	39	6449	0.604745	0	2521	0	4	30047	0.0133125	93	6277	1.4816
35	9860	0.35497	1	10390	0.00962464	13	8556	0.15194	1	7415	0.0134862	1	3841	0.0260349	511	12823	3.98503
140	2567	5.45384				34	10126	0.335769				1	5400	0.0185185	104	7056	1.47392
