# Supplementary material for: Immunopeptidomics reveals determinants of Mycobacterium tuberculosis antigen presentation on MHC class I
Source: eLife journal article supplement (doi:10.7554/elife.84070), 2023-04-19
Supplement: supp [file Figure 3 - figure supplement 1 - source data 1.xlsx]

## Sheet: Percent GFP+ - % GFP+
% GFP+
	Mock	H37RV	eccCa1:Tn
Donor A	0.17	71	73.7
Donor B	0.98	74	81.5
Donor C	0.062	84.7	79.2

## Sheet: Relative MHC-I MFI
Table 1
	Mock	H37RV	eccCa1:Tn
Donor A	1	1.02492	0.977543
Donor B	1	0.931078	0.914978
Donor C	1	1.11442	1.04864
