# Supplementary material for: Immunopeptidomics reveals determinants of Mycobacterium tuberculosis antigen presentation on MHC class I
Source: eLife journal article supplement (doi:10.7554/elife.84070), 2023-04-19
Supplement: supp [file Figure 3 - source data 1.xlsx]

## Sheet: Sheet 1
Table 1
	LLDEGKQSL (EsxA)			QTVEDEARRM(Ox)W (EsxJ)			QTVEDEARRMW (EsxJ)
	Donor A	Donor B	Donor C	Donor A	Donor B	Donor C	Donor A	Donor B	Donor C
Mock	0.0103169	0.037371	0.00284575	0.00555109	0.00100992	0.00596653	0.0357603	0.00249743	0
H37Rv	1	1	1	1	1	1	1	1	1
eccCa1:Tn	0.0295509	0.0175039	0.0140655	0.0331925	0.0181615	0.0146816	0.0254721	0.0114243	0.00640301
eccCa1:Tn + IFN-β	0.00561019	0.0136543	0.0107876	0.0200984	0.0202032	0.0204311	0.00336039	0.0095494	0.0161956
