# Supplementary material for: Immunopeptidomics reveals determinants of Mycobacterium tuberculosis antigen presentation on MHC class I
Source: eLife journal article supplement (doi:10.7554/elife.84070), 2023-04-19
Supplement: supp [file Figure 3 - source data 2.xlsx]

## Sheet: Sheet1
Application: Tecan i-control				Tecan i-control , 1.10.4.0
Device: infinite M1000Pro				Serial number: 1312005136
Firmware: V_1.05_11/2011_S3LCE_ALPHA (Nov 3 2011/09.27.24)				MAI, V_1.05_11/2011_S3LCE_ALPHA (Nov 3 2011/09.27.24)
Date:	2022-06-27
Time:	11:04:34 PM
System				GALITSPC
User				GALITSPC\Andrew
Plate				Greiner 96 Flat Bottom Transparent Polystyrol [GRE96ft.pdfx]
Plate-ID (Stacker)
Label: BCA
Mode				Absorbance
Measurement Wavelength				450	nm
Reference Wavelength				570	nm
Number of Flashes				25
Settle Time				0	ms
Start Time:	6/27/2022 11:04:34 PM
	Temperature: 24.3 °C
Dual wavelength measurement with measurement wavelength
<>	1	2	3	4	5	6	7	8	9	10	11	12
A	0.0438	0.0435	0.044	0.0434	0.0441	0.0439	0.0437	0.0435	0.0435	0.0439	0.0433	0.0434
B	0.0436	0.0486	0.2492	0.0494	1.0975	0.0499	0.4379	0.0561	0.8678	0.0431	0.0383	0.0375
C	0.0458	0.0551	0.1553	0.0561	1.3381	0.0543	0.1891	0.0554	0.8936	0.0486	0.0442	0.0434
D	0.0447	0.0566	0.1779	0.0563	1.3614	0.0535	0.1587	0.053	0.7314	0.0473	0.0434	0.044
E	0.0436	0.0524	0.3079	0.0568	1.3517	1.1396	0.4785	0.2593	0.188	0.0985	0.0732	0.0467
F	0.0434	0.0518	0.4032	0.0585	1.3658	1.1795	0.664	0.2837	0.2041	0.1	0.0665	0.0426
G	0.0457	0.0552	0.7109	0.0711	1.0572	1.1403	0.6484	0.3276	0.2179	0.1109	0.0728	0.0476
H	0.0452	0.045	0.0454	0.0456	0.046	0.0468	0.0453	0.0455	0.0446	0.0456	0.0449	0.0463
Dual wavelength measurement with reference wavelength
<>	1	2	3	4	5	6	7	8	9	10	11	12
A	0.041	0.041	0.0403	0.0406	0.0399	0.0405	0.0402	0.0402	0.0406	0.0398	0.0397	0.0397
B	0.0399	0.0343	0.035	0.0339	0.0846	0.035	0.0353	0.0348	0.3689	0.034	0.035	0.0347
C	0.0428	0.0403	0.0409	0.0399	0.0657	0.0402	0.041	0.0405	0.2275	0.0405	0.04	0.0404
D	0.042	0.0424	0.0417	0.0416	0.0524	0.0402	0.0415	0.0408	0.1978	0.0415	0.0404	0.0419
E	0.0404	0.0384	0.0392	0.0395	0.1385	0.0475	0.0386	0.0387	0.0387	0.0383	0.0393	0.0395
F	0.0398	0.0333	0.0345	0.0346	0.1216	0.0442	0.0359	0.0345	0.0348	0.0343	0.0355	0.0347
G	0.0431	0.0392	0.0416	0.0402	0.4087	0.0499	0.0428	0.0405	0.0407	0.0404	0.0404	0.0391
H	0.0421	0.0416	0.0421	0.0435	0.0433	0.0445	0.0428	0.0439	0.0421	0.0441	0.0436	0.045
Calculated difference between measurement and reference measurement
<>	1	2	3	4	5	6	7	8	9	10	11	12
A	0.0029	0.0025	0.0037	0.0028	0.0042	0.0034	0.0034	0.0033	0.003	0.0041	0.0035	0.0037
B	0.0036	0.0143	0.2142	0.0156	1.0129	0.0149	0.4026	0.0213	0.4989	0.0091	0.0033	0.0027		12.8182	194.545	14	920.636	13.3636	365.818	19.1818	453.364
C	0.003	0.0148	0.1144	0.0162	1.2724	0.0141	0.1481	0.0149	0.6661	0.0081	0.0042	0.003		13.2727	103.818	14.5455	1156.55	12.6364	134.455	13.3636	605.364
D	0.0027	0.0142	0.1361	0.0147	1.3089	0.0133	0.1172	0.0123	0.5336	0.0058	0.003	0.0021		12.7273	123.545	13.1818	1189.73	11.9091	106.364	11	484.909
E	0.0032	0.014	0.2687	0.0173	1.2131	1.0921	0.4399	0.2206	0.1493	0.0602	0.0339	0.0072		12.5455	244.091	15.5455	1102.64	992.636	399.727	200.364	135.545
F	0.0035	0.0185	0.3687	0.0239	1.2442	1.1353	0.6281	0.2493	0.1693	0.0657	0.0311	0.0079		16.6364	335	21.5455	1130.91	1031.91	570.818	226.455	153.727
G	0.0026	0.016	0.6692	0.0308	0.6485	1.0904	0.6057	0.2871	0.1772	0.0705	0.0324	0.0085		14.3636	608.182	27.8182	589.364	991.091	550.455	260.818	160.909
H	0.0031	0.0034	0.0033	0.0021	0.0028	0.0024	0.0026	0.0016	0.0026	0.0014	0.0014	0.0013
End Time:	6/27/2022 11:04:57 PM				Concentration (pg/mL)	1000	500	250	125	62.5	31.25	15.625	0			Mock	WT	ESX	ESX + IFNb
					Absorbance	1.10593	0.5579	0.252333	0.165267	0.0654667	0.0324667	0.00786667	0.00766667		Donor A	12.9394	140.636	13.9091	1088.97
															Donor B	12.6364	202.212	14.5152	514.545
															Donor C	14.5152	395.758	21.6364	940.97
Movement				Move Plate Out
