# Supplementary material for: Immunopeptidomics reveals determinants of Mycobacterium tuberculosis antigen presentation on MHC class I
Source: eLife journal article supplement (doi:10.7554/elife.84070), 2023-04-19
Supplement: supp [file Figure 4 - figure supplement 1 - source data 2.xlsx]

## Sheet: K48-Ub assay (MG-132) - Relativ
Relative K48-Ub western blot integrated density (% of maximum)
[MG-132] (μM)	+Mtb			-Mtb
	Donor A	Donor B	Donor C	Donor A	Donor B	Donor C
0	15.065	36.9246	28.406	0	13.329	23.2184
0.25	61.955	100	100	22.495	21.41	28.581
0.5	89.415	72.365	67.55	53.212	97.885	70.154
1	100	90.837	71.261	94.686	100	100
2	77.899	88.165	51.95	100	69.74	76.236
5	90.853	74.622	57.323	63.164	44.457	79.125

## Sheet: Cathepsin B activity (E64d) - R
Relative cathepsin B activity (% of DMSO control)
[E64d] (μM)	Mock				+Mtb
80	0.0399538	0.0318638	-0.0187305	-0.00740456	0.0471202	0.0935932	0.0708136	-0.0533187
40	0.1683	0.345845	0.840031	-0.0405185	0.767721	0.470347	1.00643	0.237397
20	1.4988	0.43555	14.4388	0.592225	10.9509	1.90214	13.8305	2.19282
10	14.4571	9.85192	82.825	3.76402	69.0183	50.2045	87.3639	21.9111
5	37.6779	19.4045	110.331	13.5384	65.1844	66.0668	97.3034	53.2812
2.5	51.412	31.5021	109.779	43.8594	94.0304	45.9468	101.766	69.339
1.25	70.8934	111.806	123.32	62.2683	118.03	109.318	97.6357	82.6797
0.625	102.491	98.2067	136.564	74.9775	107.49	112.445	143.138	82.2096

## Sheet: Lysotracker staining (bafilomyc
Relative mean lysotracker intensity per cell (normalized to DMSO control)
	Mock		+Mtb
	DMSO	Bafilomycin	DMSO	Bafilomycin
Donor A	100	34.2552	100	76.0261
Donor B	100	24.9287	100	30.5814
Donor C	100	26.2376	100	65.5226
