# Supplementary material for: Immunopeptidomics reveals determinants of Mycobacterium tuberculosis antigen presentation on MHC class I
Source: eLife journal article supplement (doi:10.7554/elife.84070), 2023-04-19
Supplement: supp [file Figure 4 - figure supplement 2 - source data 1.xlsx]

## Sheet: MG-132 - MG-132 LDH (% cytotoxi
MG-132 LDH (% cytotoxicity)
[MG-132] (μM)	+Mtb				Mock
	Donor A	Donor B	Donor C	Donor D	Donor A	Donor B	Donor C	Donor D
5	47.7034	27.4004	23.5557	38.7017	41.6087	25.576	24.5174	35.0485
2	18.3165	23.8966	34.8294	35.2094	9.25006	12.1161	26.1083	20.3104
1	24.2653	26.3234	34.649	36.9643	16.2479	12.9494	35.377	21.6415
0.5	10.6229	2.27096	17.9924	12.1303	3.64798	2.90545	14.6702	5.1455
0.25	8.48704	1.74389	-6.07093	4.12151	0.373789	-2.06408	0.176068	8.48828
0.125	10.0814	0.561438	-3.18573	7.25372	0.44476	-0.593197	0.93693	1.23862

## Sheet: Bafilomycin - Bafilomycin LDH (
Bafilomycin LDH (% cytotoxicity)
	+Mtb	Mock
Donor A	5.02754	3.30731
Donor B	-7.61951	-3.34127
Donor C	-0.774729	3.67226
Donor D	-4.2928	-0.143263

## Sheet: E64d - E64d LDH (% cytotoxicity
E64d LDH (% cytotoxicity)
[E64d] (μM)	+Mtb			Mock
	Donor A	Donor B	Donor C	Donor A	Donor B	Donor C
80	7.65273	-4.22617	-7.87431	12.7509	-3.11484	-2.23602
40	1.07035	-6.83277	-22.7626	8.68814	-4.78205	-13.5849
20	-0.356782	-9.6023	-10.6051	7.66968	-11.1662	-13.2594
10	0.111172	-18.2559	-11.4654	4.5371	-21.1126	-8.43178
5	-3.23173	-28.9698	-29.7297	2.95242	-15.7856	-19.2683
2.5	-1.71152	-26.047	-35.1725	0.897125	-20.4213	-16.291
1.25	0.77303	-17.9205	3.73141	1.62512	-29.3103	-7.87126
