# Supplementary material for: Immunopeptidomics reveals determinants of Mycobacterium tuberculosis antigen presentation on MHC class I
Source: eLife journal article supplement (doi:10.7554/elife.84070), 2023-04-19
Supplement: supp [file Figure 4 - figure supplement 3 - source data 1.xlsx]

## Sheet: Phagocytosis assay - Phagocytos
Phagocytosis (%GFP+ hMDMs)
	DMSO	MG-132	Bafilomycin	E64d
Donor A	49.9	51.4	46.1	45.2
Donor B	55.8	50.8	52.4	53.6
Donor C	61.3	61.6	60.6	64.8

## Sheet: Lux assay - Luminescence (mean 
Luminescence (mean of n=3 technical replicates; a.u.)
		Mock	RIF	DMSO	MG-132	E64d	Bafilomycin
4:00:00	Donor A	50.3333	96.6667	139.667	159.667	124.667	110.333
	Donor B	29	86.6667	161.667	188.667	225.333	184.333
	Donor C	39.3333	85.3333	181.667	191.333	179	160
1	Donor A	36	94.3333	424.333	581.333	417	389.333
	Donor B	24.6667	109.667	193.667	560	248	233
	Donor C	34.6667	94.3333	318.667	587.333	345.333	287.333

## Sheet: Surface MHC-I – relative MFI
Relative Surface MHC-I (MFI) at 24h post-infection, normalized to DMSO
	Mock	DMSO	MG-132	E64d	Bafilomycin
Donor A	0.596607	1	1.53665	0.152155	1.09667
Donor B	0.651236	1	0.697144	0.779758	0.613742
Donor C	0.573637	1	0.992691	0.601125	0.785007
