# Supplementary material for: Immunopeptidomics reveals determinants of Mycobacterium tuberculosis antigen presentation on MHC class I
Source: eLife journal article supplement (doi:10.7554/elife.84070), 2023-04-19
Supplement: supp [file Figure 4 - figure supplement 4 - source data 1.xlsx]

## Sheet: Surface HLA-DR – MFI
Relative Surface HLA-DR (MFI) at 24h post-infection, normalized to DMSO control
	Isotype	Mock	DMSO	E64d	Bafilomycin
Donor A	0.00934702	0.936809	1	0.991575	1.0524
Donor B	0.0162781	0.880907	1	0.7385	0.607225
Donor C	0.0156567	0.950845	1	0.942003	1.10741

## Sheet: Surface HLA-DQ – MFI
Relative Surface HLA-DQ (MFI) at 24h post-infection, normalized to DMSO control
	Isotype	Mock	DMSO	E64d	Bafilomycin
Donor A	0.0241647	0.899767	1	0.892774	0.93784
Donor B	0.0276857	0.81615	1	0.623648	0.713771
Donor C	0.20101	0.823232	1	0.90404	1.07576
