# Supplementary material for: Immunopeptidomics reveals determinants of Mycobacterium tuberculosis antigen presentation on MHC class I
Source: eLife journal article supplement (doi:10.7554/elife.84070), 2023-04-19
Supplement: supp [file Figure 4 - source data 1.xlsx]

## Sheet: Mean fold changes
Table 1
	Mock	DMSO	MG-132	Bafilomycin	E64d
LLDEGKQSL	0.00879626	1	0.932103	2.29117	1.36036
QTVEDEARRM(ox)W	0.0244346	1	0.964798	2.56956	1.01937
KLDVGNAEV	1.09271	1	0.654304	1.48041	0.760699
KQVSDLISV	0.78133	1	0.716924	1.47829	0.882424
RTLAEIAKV	0.864216	1	1.39851	1.44906	0.800708
SLQDLIEKV	0.781195	1	1.78449	1.74504	0.750311
VLHDRIVSV	1.11899	1	0.65713	1.46454	0.985776

## Sheet: Donor A fold changes
Table 1
Peptide	Mock	DMSO	MG-132	bafilomycin	E64d
LLDEGKQSL	0.0125204	1	0.535529	2.30774	1.65653
QTVEDEARRM(ox)W	0.0540225	1	0.879944	3.17951	1.63345
KLDVGNAEV	1.13331	1	0.550476	1.62862	0.864338
KQVSDLISV	0.65656	1	0.644155	1.38942	0.871145
RTLAEIAKV	0.651491	1	1.25527	1.40216	0.940867
SLQDLIEKV	0.398783	1	0.328338	2.39346	0.725028
VLHDRIVSV	1.42502	1	0.816739	2.14631	1.39007

## Sheet: Donor B fold changes
Table 1
Peptide	Mock	DMSO	MG-132	bafilomycin	E64d
LLDEGKQSL	0.0014273	1	0.941794	4.52381	7.18061
QTVEDEARRM(ox)W	0.0127083	1	1.15847	3.25526	1.09064
KLDVGNAEV	1.01992	1	0.578388	1.41572	0.569432
KQVSDLISV	0.759691	1	0.541532	1.50252	0.683062
RTLAEIAKV	0.930533	1	1.33977	1.52487	0.643219
SLQDLIEKV	0.728715	1	0.738132	1.78917	0.654951
VLHDRIVSV	0.836983	1	0.437793	1.00198	0.609036

## Sheet: Donor C fold changes
Table 1
Peptide	Mock	DMSO	MG-132	bafilomycin	E64d
LLDEGKQSL	0.0118845	1	1.40419	2.49582	0.685615
QTVEDEARRM(ox)W	0.00951129	1	1.15009	2.10538	0.62291
KLDVGNAEV	1.12377	1	0.829695	1.39687	0.848326
KQVSDLISV	0.797676	1	0.833074	1.27755	0.916773
RTLAEIAKV	1.00331	1	1.65113	1.42029	0.821006
SLQDLIEKV	1.02843	1	4.26674	1.02912	0.886282
VLHDRIVSV	1.08889	1	0.713484	1.23664	0.952384

## Sheet: Donor A hipMHC correction facto
Table 1
Peptide	Mock	DMSO	MG-132	bafilomycin	E64d
SLPEEIGHL[+7]	1.82449	1	2.03887	1.11728	2.24332	1.43856
AL[+7]ADGVQKV	1.21053	1	1.19331	0.720157	1.73803	0.90981
ALNEQIARL[+7]	0.867963	1	0.967131	0.44291	1.40691	0.710249
Average	1.301	1	1.39977	0.760115	1.79609	1.01954

## Sheet: Donor B hipMHC correction facto
Table 1
Peptide	Mock	DMSO	MG-132	bafilomycin	E64d
SLPEEIGHL[+7]	0.799238	1	0.951996	0.489616	1.42004
AL[+7]ADGVQKV	1.24792	1	0.97176	0.699277	1.22506
Average	1.02358	1	0.961878	0.594446	1.32255

## Sheet: Donor C hipMHC correction facto
Table 1
Peptide	Mock	DMSO	MG-132	bafilomycin	E64d
SLPEEIGHL[+7]	0.550142	1	0.700617	0.55004	1.09013
AL[+7]ADGVQKV	0.550606	1	0.785809	0.515825	1.06886
ALNEQIARL[+7]	0.931272	1	0.945452	0.595685	1.19928
Average	0.67734	1	0.810626	0.55385	1.11942
