# Supplementary figures and images for: Immunopeptidomics reveals determinants of Mycobacterium tuberculosis antigen presentation on MHC class I
Source: eLife journal article supplement (doi:10.7554/elife.84070), 2023-04-19

a

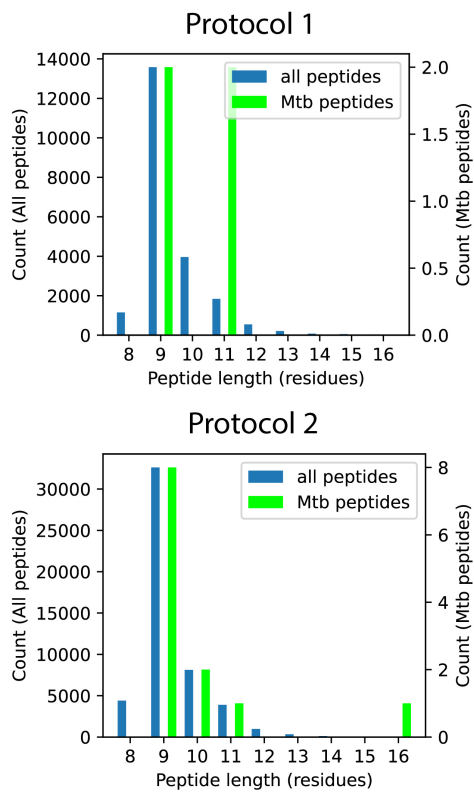

b

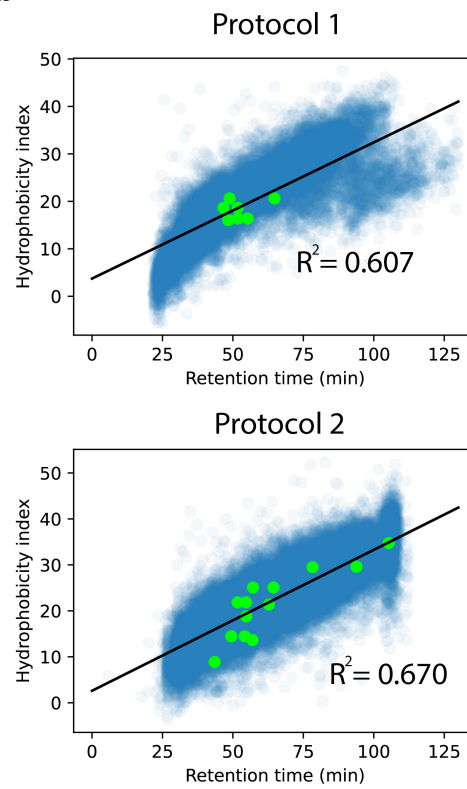

c

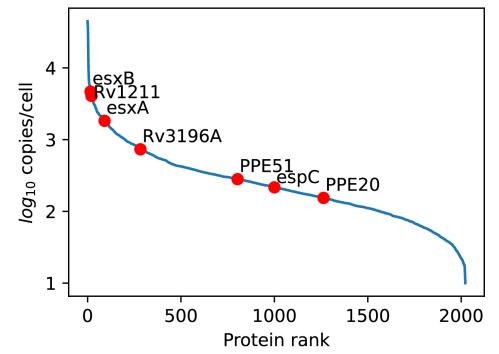

Supplement: supp [file elife-84070-supp-v1.zip]
